# Supplementary material for: ON/OFF switching of silicon wafer electrochemistry by pH-responsive polymer brushes
Source: Royal Society of Chemistry journal article supplement (doi:10.1039/c6tc01822j), 2016-01-01
Supplement: c6tc01822j1.pdf [file c6tc01822j1.pdf]

Supporting Information

# ON/OFF Switching of Silicon Wafer Electrochemistry by pH-Responsive Polymer Brushes

Guido Panzarasa<sup>‡\*a#</sup>, Matthias Dübner<sup>‡b,c</sup>, Valentina Pifferi<sup>\*d,e</sup>, Guido Soliveri<sup>d§</sup> and Celestino Padeste<sup>c</sup>

<sup>a</sup>Dipartimento di Scienze e Innovazione Tecnologica, Università del Piemonte Orientale “Amedeo Avogadro”, Viale T. Michel 11, 15100 Alessandria, Italy.

\*E-mail: [gp4779@gmail.com](mailto:gp4779@gmail.com)

<sup>#</sup>Present address: Empa Materials Science and Technology, Lerchenfeldstrasse 5, 9014 St. Gallen, Switzerland.

<sup>b</sup>Laboratory for Surface Science and Technology, Department of Materials, ETH Zürich, CH-8093 Zürich, Switzerland.

<sup>c</sup>Laboratory for Micro- and Nanotechnology, Paul Scherrer Institute, CH-5232 Villigen PSI, Switzerland.

<sup>d</sup>Dipartimento di Chimica, Università degli Studi di Milano, Via Golgi 19, 20133 Milano, Italy.

<sup>e</sup>Consorzio Interuniversitario Nazionale per la Scienza e Tecnologia dei Materiali (INSTM), Via Giusti 9, 50121 Firenze, Italy

\*E-mail: [valentina.pifferi@unimi.it](mailto:valentina.pifferi@unimi.it)

<sup>§</sup>Present address: Department of Engineering Physics, Polytechnique Montréal, C. P. 6079, Succ. Centre-ville, Montréal, Québec, H3C 3A7 Canada.

<sup>‡</sup> Equal contributors

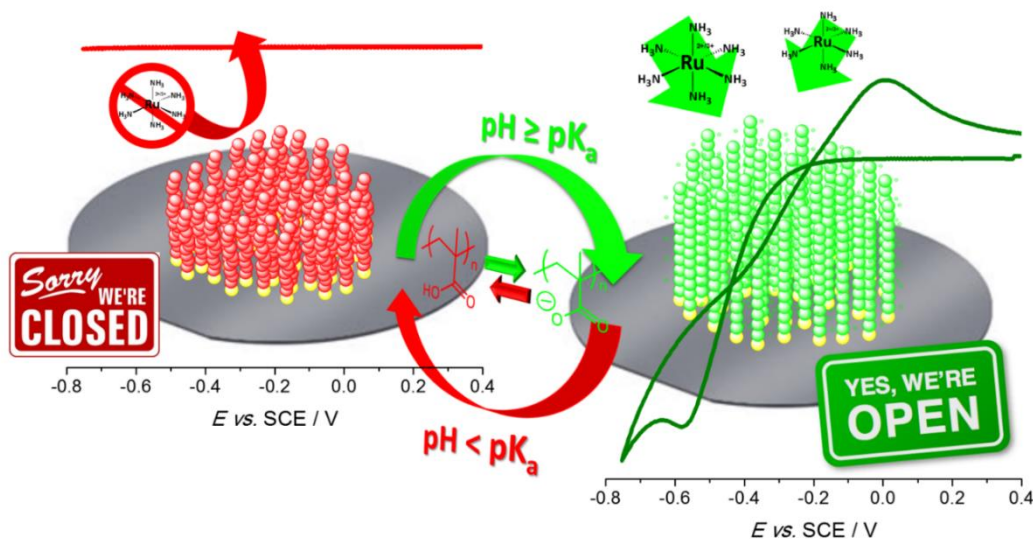

## ESTIMATION OF THE BRUSH PARAMETERS

The grafting density  $\sigma$  of self-assembled monolayers and of polymer chains on a surface can be estimated according to eq. S1:

$$\sigma = \frac{h\rho N_A}{M_n} \quad (\text{S1})$$

where  $h$  is the layer thickness,  $\rho$  is the layer density,  $N_A$  is the Avogadro's number and  $M_n$  is the molecular weight.

For a self-assembled monolayer of the BIB-APTES initiator on silicon, a surface density  $\sigma_{\text{initiator}}$  of  $\sim 4$  molecules  $\text{nm}^{-2}$  was obtained from eq. S1 using a thickness of 2 nm (determined by ellipsometry), a density of  $1.17 \text{ g cm}^{-3}$  and a molecular weight of  $286 \text{ g mol}^{-1}$  (corresponding to the fully hydrolyzed silane molecule).

Since the average initiation efficiency for similar systems<sup>1</sup> is  $\sim 10 \%$ , it is plausible to affirm that a surface density of chains  $\sigma_{\text{brushes}}$  of at least  $0.4$  chains  $\text{nm}^{-2}$  has been achieved, which is a typical value for polymer brushes. An average distance between grafting sites  $D$  of  $\sim 0.71 \text{ nm}$  can be calculated, under the assumption that each brush chain occupies a cylindrical volume with its base coincident with the grafting surface, according to eq. S2:<sup>2</sup>

$$D = \left(\frac{4}{\pi\sigma}\right)^{1/2} \quad (\text{S2})$$

Assuming a density of  $1.18 \text{ g cm}^{-3}$  for PMAA, the calculated molecular weight  $M_n$  values for the ultrathin (14 nm) and ultrathick (1  $\mu\text{m}$ ) brushes are respectively  $2.3 \times 10^4 \text{ g mol}^{-1}$  and  $1.7 \times 10^6 \text{ g mol}^{-1}$ .

| <i>Solvent</i>   | <i>pH</i> | <i>Solvent content [%]</i> | <i>Refractive index n</i> | <i>Thickness [nm]</i> | <i>MSE [nm]</i> | <i>Average thickness [nm]</i> | <i>Average MSE [nm]</i> | <i>Swelling [%]</i> |
|------------------|-----------|----------------------------|---------------------------|-----------------------|-----------------|-------------------------------|-------------------------|---------------------|
| Dry              | -         | 0.0                        | 1.5226-1.4601             | 13.7                  | 1.6             | 13.8                          | 1.4                     | 0                   |
|                  |           | 0.0                        | 1.5226-1.4601             | 14.2                  | 1.3             |                               |                         |                     |
|                  |           | 0.0                        | 1.5226-1.4601             | 13.6                  | 1.3             |                               |                         |                     |
| HCl              | 1         | 53.1                       | 1.4328-1.3875             | 33.9                  | 1.9             | 34.5                          | 1.7                     | 149                 |
|                  |           | 55.7                       | 1.4321-1.3870             | 35.6                  | 1.7             |                               |                         |                     |
|                  |           | 53.0                       | 1.4279-1.3836             | 33.9                  | 1.4             |                               |                         |                     |
| H <sub>2</sub> O | 7         | 76.7                       | 1.3926-1.3550             | 41.1                  | 1.8             | 40.7                          | 1.6                     | 194                 |
|                  |           | 76.6                       | 1.3926-1.3550             | 41.0                  | 1.8             |                               |                         |                     |
|                  |           | 73.9                       | 1.3972-1.3588             | 40.1                  | 1.3             |                               |                         |                     |
| NaOH             | 13        | 90.0                       | 1.3705-1.3370             | 69.1                  | 1.8             | 69.2                          | 1.7                     | 400                 |
|                  |           | 89.3                       | 1.3715-1.3379             | 69.0                  | 1.5             |                               |                         |                     |
|                  |           | 90.1                       | 1.3701-1.3367             | 69.4                  | 1.7             |                               |                         |                     |

**Table S1.** pH-dependent swelling behavior of ultrathin PMAA brushes probed by spectroscopic ellipsometry.

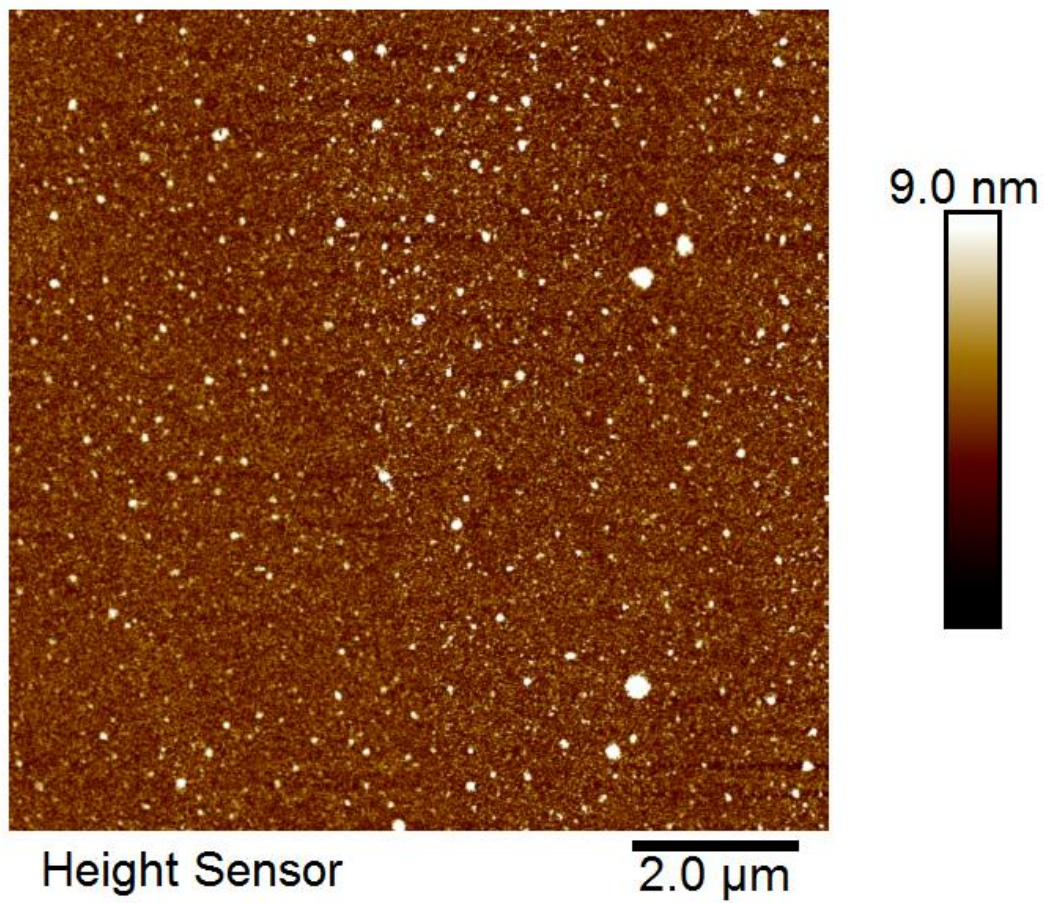

**Figure S1.** AFM image of a 10 nm-thick PMAA brushes used to measure roughness.

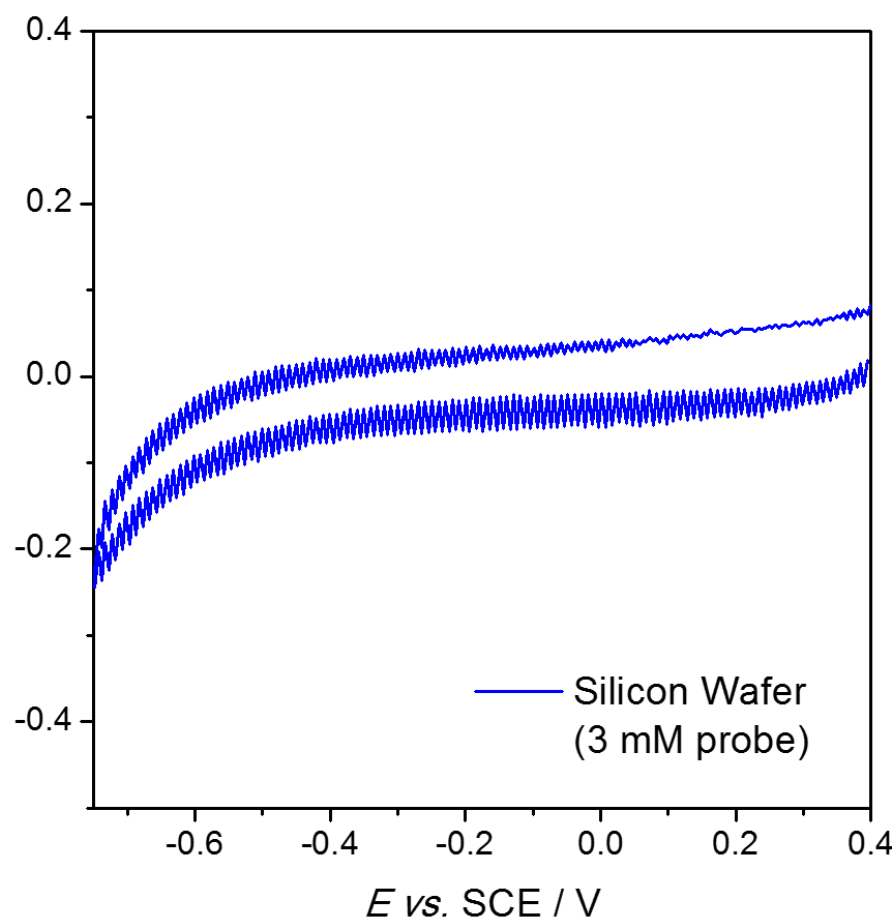

**Figure S2.** Cyclic voltammetry (CV) of native oxide-coated silicon wafer performed in presence of 3 mM ruthenium(III) hexamine showing that there is no electrochemical response for this kind of electrode.

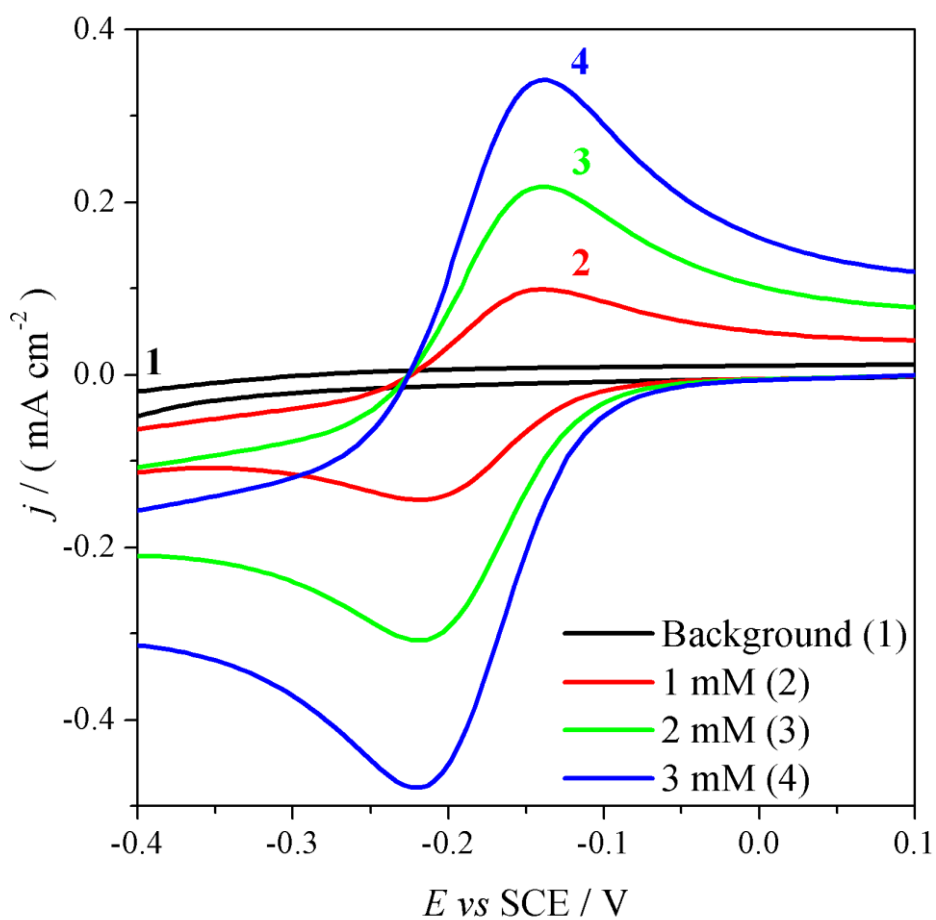

**Figure S3.** Cyclic voltammetry (CV) scans, obtained using glassy carbon as a “conventional” working electrode, showing the typical reduction and oxidation peaks of the ruthenium(III) hexamine redox probe. All other experimental conditions were the same used to analyze the PMAA brushes-modified silicon wafer electrodes.

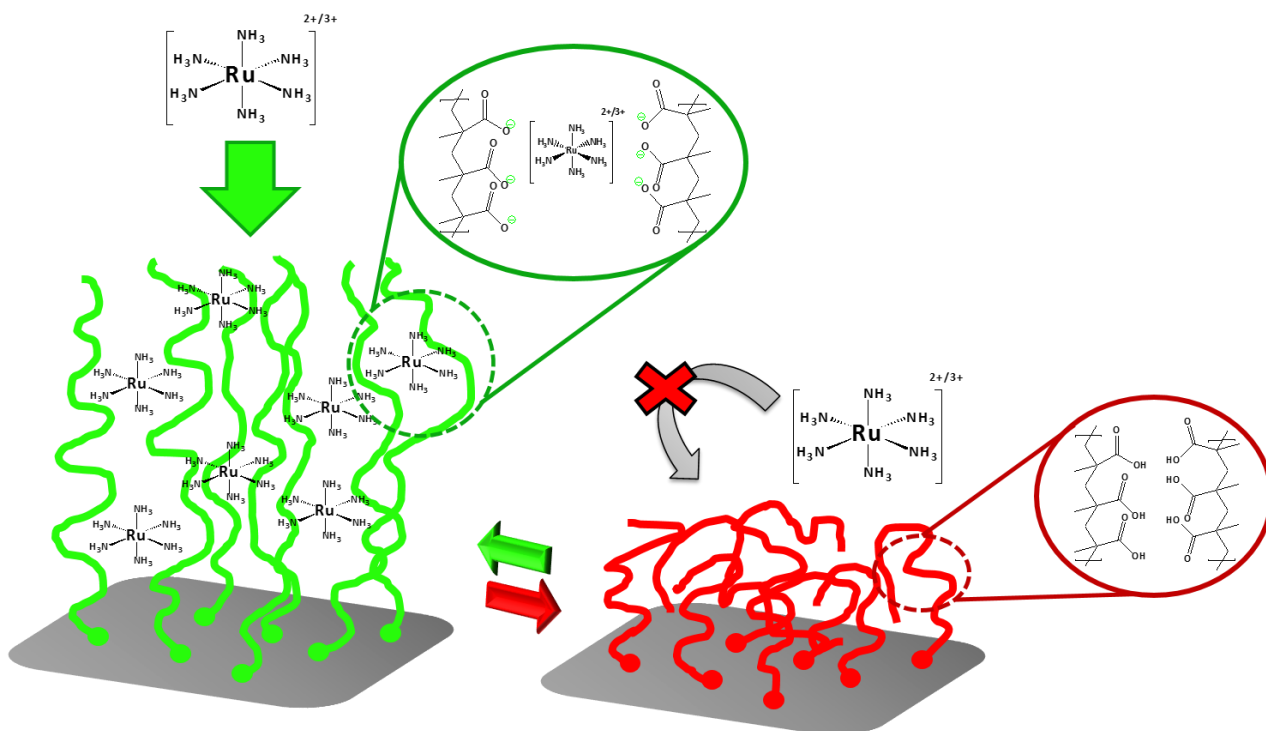

**Scheme S1.** Schematic representation of the effect of pH on the diffusion of the ruthenium probe inside the PMAA brushes: left, pH 10; right, pH 2.

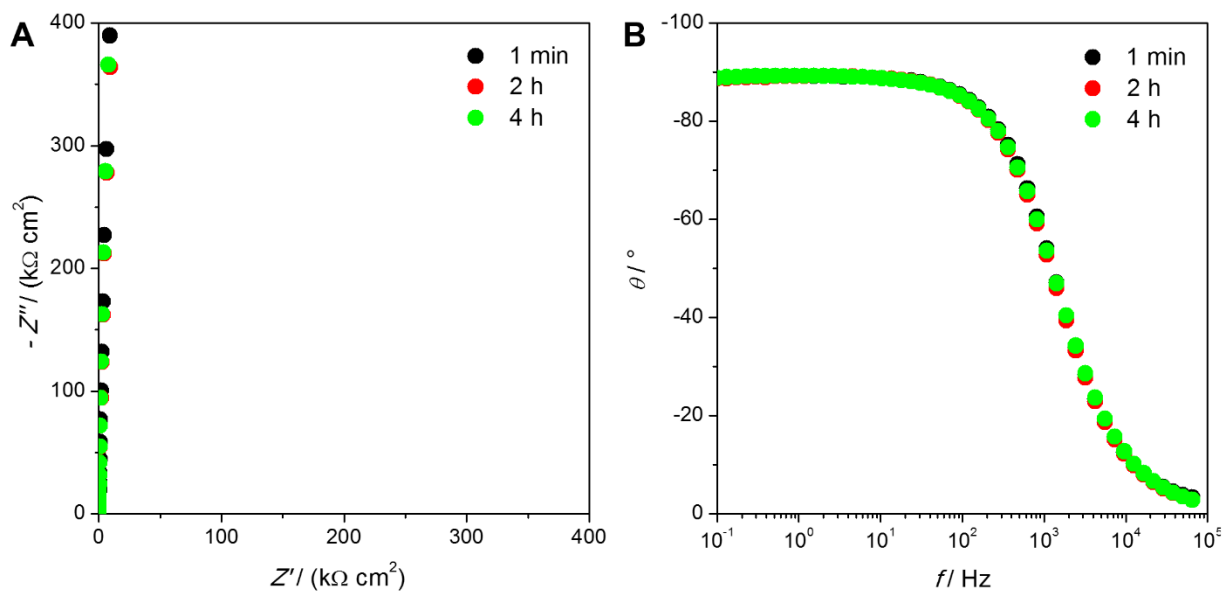

**Figure S4.** EIS investigation of the swelling of ultrathin PMAA brushes: (a) complex plane and (b) Bode plots. To collect data, the dry brushes were immersed in the supporting electrolyte (pH 7) and the EIS experiments performed after 1 min, 2 h and 4 h.



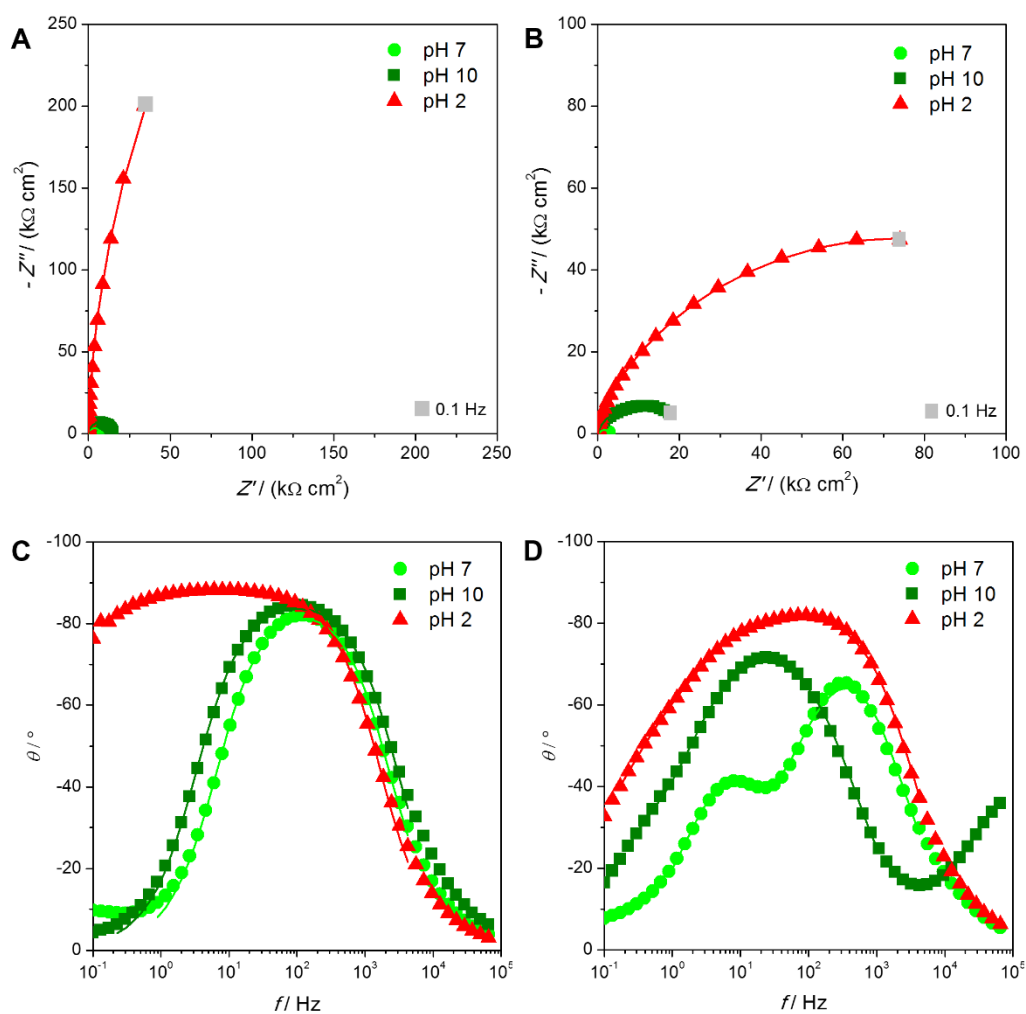

**Figure S5.** The original (not rescaled) EIS plots for a) ultrathin and b) ultrathick PMAA brushes, along with their corresponding Bode plots (c, d) obtained in the presence of the redox probe.

## REFERENCES

1. D. M. Jones, A. Brown and W. T. S. Huck, *Langmuir* 2012, **18**, 1265–1269.
2. A. Samadi, S. M. Husson, Y. Liu, I. Luzinov and S. M. Kilbey II, *Macromol. Rapid Commun.* 2005, **26**, 1829–1834.
